# Supplementary material for: Changing epidemiology and increasing healthcare burden of pediatric brain abscess in China: a nationwide study before and after COVID-19
Source: Research Square preprint supplement (doi:10.21203/rs.3.rs-8561312/v1), 2026-01-29
Supplement: Supplementary file 1 [file 354e45c35539bf12c1d5edff.pdf]

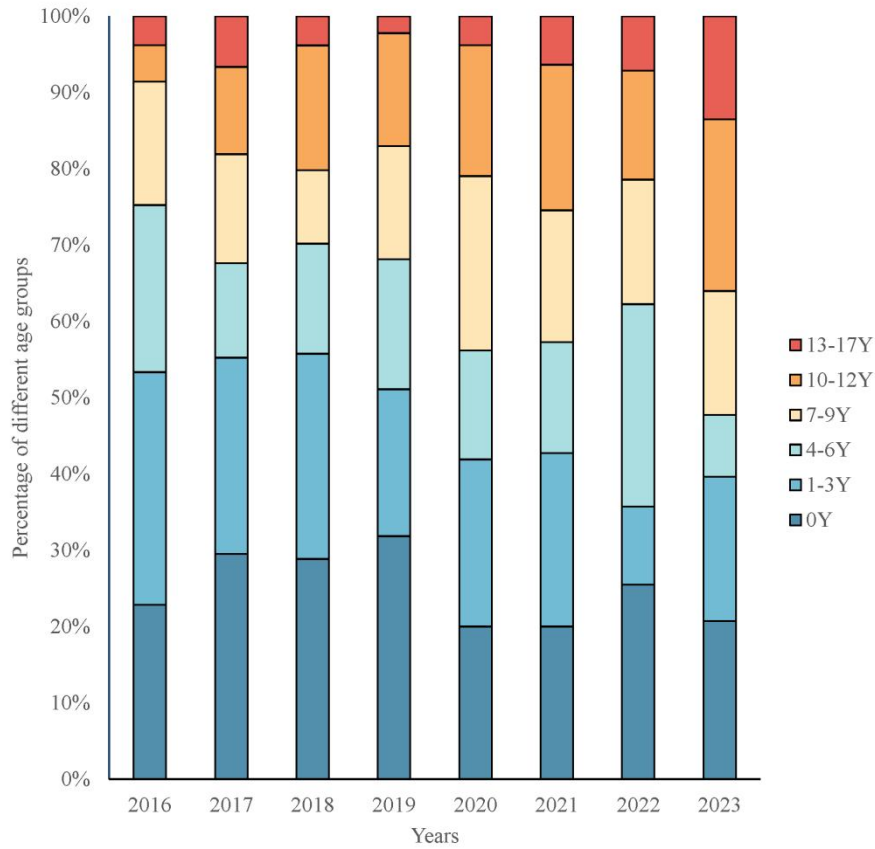

**Supplemental Figure S1.** Between 2020 and 2023, the proportion of infants and young children decreased, while the proportion of patients aged 7-17 years increased concurrently, compared to the 2016-2019 period.

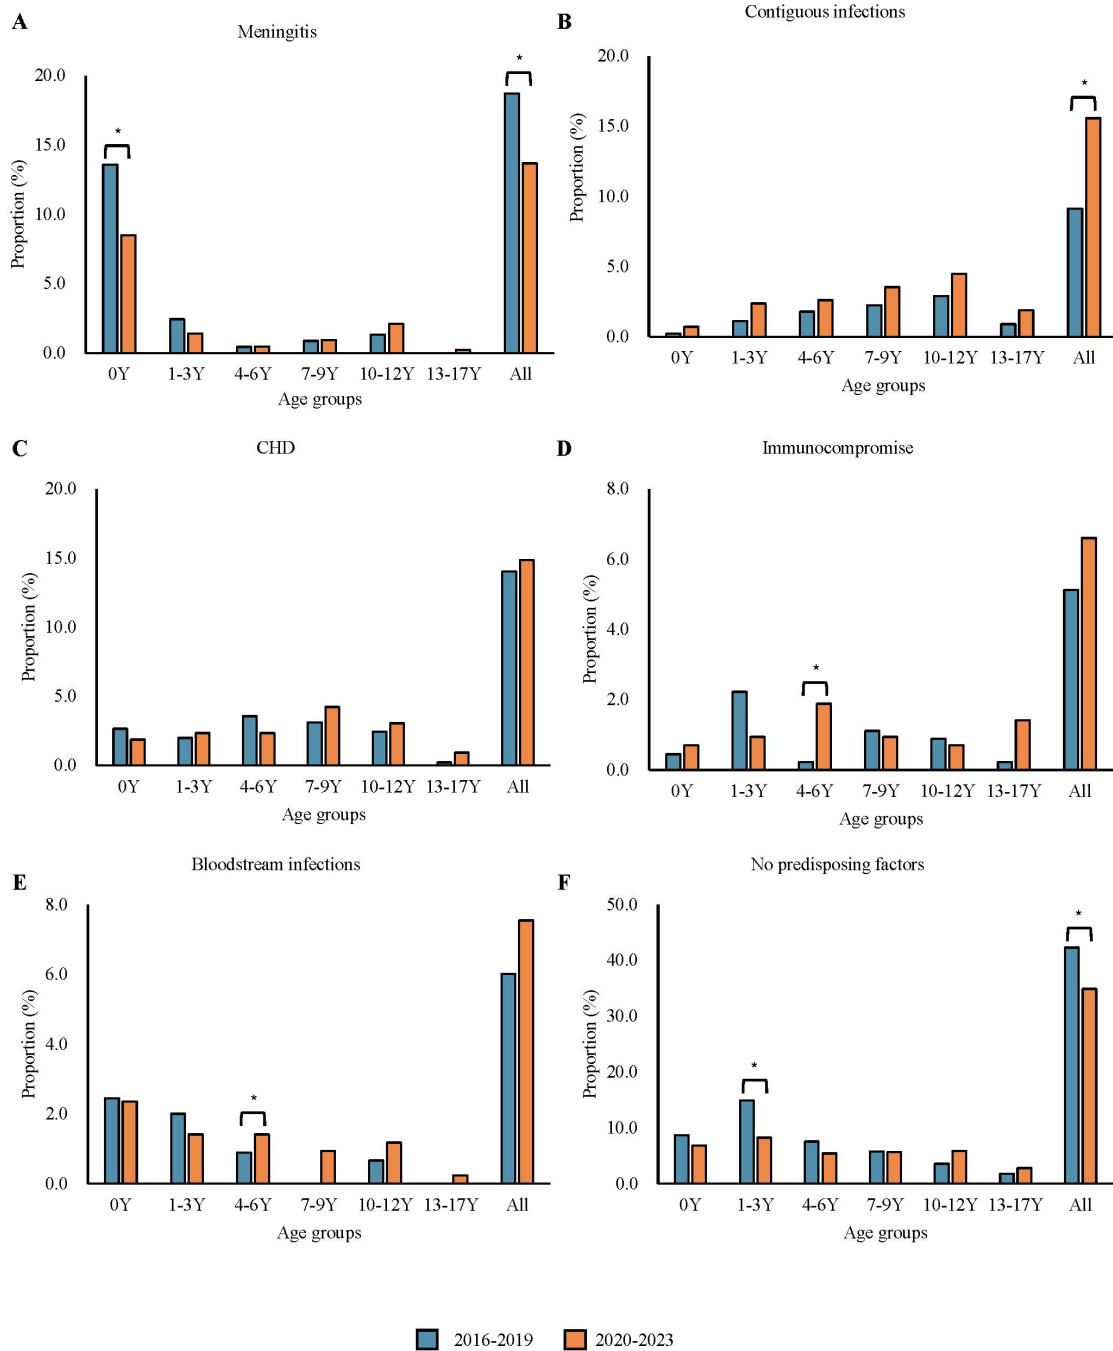

**Supplemental Figure 2.** The changes in predisposing factors among different age groups. Patients with meningitis significantly declined in the 0-year age group. The proportion of patients with contiguous infections significantly raise in those aged 7-17 years.
