# Supplementary material for: Changing epidemiology and increasing healthcare burden of pediatric brain abscess in China: a nationwide study before and after COVID-19
Source: Research Square preprint supplement (doi:10.21203/rs.3.rs-8561312/v1), 2026-01-29
Supplement: Supplementary file 2 [file 8321ccf36ddd69080bb9d53f.pdf]

**Supplemental Table S1.** The PPVs and sensitivities of different search strategies in the FUTURE database

| Search strategies                                                                             | No. of patients in the<br>FUTURE database* | No. of confirmed BA<br>in the FUTURE<br>database* | PPV<br>(%) | Sensitivity**<br>(%) |
|-----------------------------------------------------------------------------------------------|--------------------------------------------|---------------------------------------------------|------------|----------------------|
| (1) BA diagnosis in primary diagnosis, secondary diagnosis, and supplementary diagnosis       | 141                                        | 123                                               | 87.2       | 96.1                 |
| (2) BA diagnosis in primary diagnosis                                                         | 68                                         | 67                                                | 98.5       | 52.3                 |
| (3) BA diagnosis in the secondary or supplementary diagnosis                                  | 73                                         | 56                                                | 76.7       | 43.8                 |
| (4) BA diagnosis in the secondary diagnosis                                                   | 38                                         | 30                                                | 78.9       | 23.4                 |
| (5) BA diagnosis in the supplementary diagnosis                                               | 35                                         | 26                                                | 74.3       | 20.3                 |
| (6) BA diagnosis in the supplementary diagnosis and CNS infection*** in the primary diagnosis | 38                                         | 32                                                | 84.2       | 25.0                 |
| (7) BA diagnosis in the supplementary diagnosis and pathogen confirmed BI or IE               | 17                                         | 16                                                | 94.1       | 12.5                 |
| (8) BA diagnosis in the supplementary diagnosis and any known predisposing factors            | 31                                         | 25                                                | 80.6       | 19.5                 |
| (9) BA diagnosis in the supplementary diagnosis and neurosurgeries about BA                   | 3                                          | 3                                                 | 100.0      | 2.3                  |
| (10)=(4)+(6)+(7)+(8)+(9)                                                                      | 69                                         | 56                                                | 81.2       | 43.8                 |
| (11)=(2)+(10)****                                                                             | 137                                        | 123                                               | 89.8       | 96.1                 |
| (12)=(6)+(7)+(8)+(9)                                                                          | 62                                         | 51                                                | 82.3       | 39.8                 |
| (13)=(2)+(12)                                                                                 | 130                                        | 118                                               | 90.8       | 92.2                 |

\*Including BA patients admitted to Beijing Children's Hospital from 2016 to 2023 in the FUTURE database

\*\*The number of confirmed BA in the Medical Record System of Beijing Children's Hospital was 128

\*\*\*Excluding viral CNS infections

\*\*\*\*The strategy that was used to identify all patients with a BA diagnosis admitted to 33 hospitals in the entire FUTURE database

PPV: positive predictive value; FUTURE database: FuTang Update Medical Records database; BA: brain abscess; CNS: central nervous system

**Supplemental Table S2** The specific criteria for brain abscess

| Categories  | Details                                                                                                                                                                                                                                                                                                                                                                                                   |
|-------------|-----------------------------------------------------------------------------------------------------------------------------------------------------------------------------------------------------------------------------------------------------------------------------------------------------------------------------------------------------------------------------------------------------------|
|             | Meet (1) or (2)                                                                                                                                                                                                                                                                                                                                                                                           |
| Definite BA | (1) A brain abscess confirmed by aspiration of pus or histologic examination<br>(2) For patients not undergoing neurosurgery, a BA was diagnosed via imaging findings*, with pathogen evidence from one or more of the following: positive culture (blood, CSF, or extracranial abscess pus), positive Gram stain (CSF or extracranial pus), or positive mNGS** testing (CSF or extracranial abscess pus) |
| Probable BA | Patients presented clinical manifestations of BA (such as fever, seizures, headache, local neurologic deficits, or decreased consciousness), imaging findings consistent with BA, a good treatment response (BA improved after antibiotic treatments) and no causative pathogens were identified                                                                                                          |
| Possible BA | Patients presented clinical manifestations of BA, imaging findings consistent with BA, known predisposing factors, but there was not enough time to observe a favorable response to antibiotics due to the progressive development of the disease                                                                                                                                                         |
| Not BA      | Did not fulfill the criteria described above or had proven alternative diagnosis                                                                                                                                                                                                                                                                                                                          |

\*Imaging findings comprised findings from brain MRI (including DWI/ADC maps, and T1-weighted sequences), or contrast-enhanced CT (Bodilsen, J, QG D'Alessandris, H Humphreys, MA Iro, M Klein, K Last, et al. 2024. Clin Microbiol Infect 30:66-89.)  
\*\*The results of mNGS were confirmed by the infectious disease specialists  
ADC: apparent diffusion coefficient; BA: brain abscess; CSF: cerebrospinal fluid; CT: computed tomography; ADC: apparent diffusion coefficient; mNGS: metagenomic next-generation sequencing; MRI: Magnetic Resonance Imaging;

**Supplemental Table S3.** The details of confirmed BA in the MRS of BCH

| No. of Patients | Sex    | Age      | Categories of BA | Details                                                           |
|-----------------|--------|----------|------------------|-------------------------------------------------------------------|
| 2               | Male   | 2 years  | Definite BA      | Surgery proven and pathogen positive                              |
| 3               | Male   | 7 years  | Definite BA      | Surgery proven but pathogen negative                              |
| 4               | Male   | 8 years  | Definite BA      | Patients without neurosurgery but with a positive pathogen result |
| 6               | Male   | 1 year   | Definite BA      | Surgery proven and pathogen positive                              |
| 8               | Female | 7 years  | Definite BA      | Patients without neurosurgery but with a positive pathogen result |
| 12              | Female | 4 years  | Definite BA      | Surgery proven and pathogen positive                              |
| 14              | Male   | 2 years  | Definite BA      | Surgery proven but pathogen negative                              |
| 15              | Female | 1 year   | Definite BA      | Surgery proven but pathogen negative                              |
| 16              | Female | 0 years  | Definite BA      | Surgery proven and pathogen positive                              |
| 18              | Male   | 13 years | Definite BA      | Patients without neurosurgery but with a positive pathogen result |
| 20              | Male   | 11 years | Definite BA      | Patients without neurosurgery but with a positive pathogen result |
| 22              | Male   | 1 year   | Definite BA      | Surgery proven and pathogen positive                              |
| 29              | Male   | 1 year   | Definite BA      | Surgery proven and pathogen positive                              |
| 30              | Female | 5 years  | Definite BA      | Surgery proven but pathogen negative                              |
| 33              | Male   | 1 year   | Definite BA      | Surgery proven and pathogen positive                              |
| 35              | Female | 4 months | Definite BA      | Surgery proven and pathogen positive                              |
| 39              | Female | 4 years  | Definite BA      | Surgery proven but pathogen negative                              |
| 43              | Male   | 6 years  | Definite BA      | Surgery proven but pathogen negative                              |
| 44              | Female | 3 years  | Definite BA      | Surgery proven but pathogen negative                              |
| 45              | Male   | 13 years | Definite BA      | Patients without neurosurgery but with a positive pathogen result |
| 48              | Male   | 3 months | Definite BA      | Surgery proven and pathogen positive                              |
| 55              | Male   | 12 years | Definite BA      | Patients without neurosurgery but with a positive pathogen result |
| 56              | Male   | 1 month  | Definite BA      | Surgery proven but pathogen negative                              |
| 57              | Male   | 8 years  | Definite BA      | Surgery proven and pathogen positive                              |

|     |        |          |             |                                                                   |
|-----|--------|----------|-------------|-------------------------------------------------------------------|
| 59  | Female | 12 years | Definite BA | Surgery proven but pathogen negative                              |
| 61  | Male   | 3 years  | Definite BA | Surgery proven but pathogen negative                              |
| 62  | Male   | 6 years  | Definite BA | Surgery proven and pathogen positive                              |
| 63  | Male   | 3 months | Definite BA | Patients without neurosurgery but with a positive pathogen result |
| 65  | Female | 11 years | Definite BA | Patients without neurosurgery but with a positive pathogen result |
| 66  | Male   | 2 months | Definite BA | Surgery proven and pathogen positive                              |
| 67  | Male   | 1 year   | Definite BA | Surgery proven and pathogen positive                              |
| 69  | Male   | 5 years  | Definite BA | Surgery proven and pathogen positive                              |
| 70  | Male   | 10 years | Definite BA | Surgery proven and pathogen positive                              |
| 73  | Male   | 10 years | Definite BA | Surgery proven and pathogen positive                              |
| 74  | Male   | 2 years  | Definite BA | Surgery proven but pathogen negative                              |
| 75  | Male   | 1 year   | Definite BA | Surgery proven and pathogen positive                              |
| 76  | Female | 2 years  | Definite BA | Patients without neurosurgery but with a positive pathogen result |
| 77  | Male   | 13 years | Definite BA | Surgery proven but pathogen negative                              |
| 81  | Female | 11 years | Definite BA | Patients without neurosurgery but with a positive pathogen result |
| 87  | Female | 9 days   | Definite BA | Surgery proven and pathogen positive                              |
| 88  | Male   | 12 years | Definite BA | Surgery proven but pathogen negative                              |
| 89  | Female | 4 years  | Definite BA | Surgery proven and pathogen positive                              |
| 90  | Male   | 2 years  | Definite BA | Patients without neurosurgery but with a positive pathogen result |
| 91  | Male   | 1 year   | Definite BA | Surgery proven but pathogen negative                              |
| 92  | Female | 4 years  | Definite BA | Surgery proven and pathogen positive                              |
| 95  | Male   | 4 years  | Definite BA | Patients without neurosurgery but with a positive pathogen result |
| 98  | Female | 7 days   | Definite BA | Patients without neurosurgery but with a positive pathogen result |
| 101 | Male   | 8 years  | Definite BA | Surgery proven and pathogen positive                              |
| 102 | Female | 7 years  | Definite BA | Surgery proven and pathogen positive                              |
| 104 | Male   | 6 months | Definite BA | Surgery proven and pathogen positive                              |

|     |        |          |             |                                                                   |
|-----|--------|----------|-------------|-------------------------------------------------------------------|
| 105 | Male   | 10 years | Definite BA | Surgery proven and pathogen positive                              |
| 106 | Male   | 4 years  | Definite BA | Patients without neurosurgery but with a positive pathogen result |
| 107 | Female | 1 year   | Definite BA | Patients without neurosurgery but with a positive pathogen result |
| 108 | Male   | 3 years  | Definite BA | Surgery proven and pathogen positive                              |
| 109 | Female | 7 years  | Definite BA | Surgery proven and pathogen positive                              |
| 110 | Male   | 9 months | Definite BA | Surgery proven and pathogen positive                              |
| 112 | Male   | 4 years  | Definite BA | Surgery proven and pathogen positive                              |
| 113 | Male   | 9 years  | Definite BA | Surgery proven and pathogen positive                              |
| 114 | Male   | 12 days  | Definite BA | Patients without neurosurgery but with a positive pathogen result |
| 115 | Male   | 9 years  | Definite BA | Surgery proven and pathogen positive                              |
| 116 | Female | 7 years  | Definite BA | Patients without neurosurgery but with a positive pathogen result |
| 117 | Male   | 6 years  | Definite BA | Patients without neurosurgery but with a positive pathogen result |
| 118 | Male   | 2 years  | Definite BA | Surgery proven and pathogen positive                              |
| 119 | Male   | 9 years  | Definite BA | Surgery proven and pathogen positive                              |
| 120 | Female | 8 years  | Definite BA | Patients without neurosurgery but with a positive pathogen result |
| 122 | Female | 2 years  | Definite BA | Surgery proven and pathogen positive                              |
| 123 | Male   | 12 years | Definite BA | Patients without neurosurgery but with a positive pathogen result |
| 126 | Female | 4 years  | Definite BA | Surgery proven but pathogen negative                              |
| 127 | Male   | 11 years | Definite BA | Surgery proven and pathogen positive                              |
| 129 | Female | 12 years | Definite BA | Surgery proven and pathogen positive                              |
| 130 | Female | 12 years | Definite BA | Surgery proven and pathogen positive                              |
| 131 | Male   | 2 months | Definite BA | Patients without neurosurgery but with a positive pathogen result |
| 132 | Female | 5 years  | Definite BA | Patients without neurosurgery but with a positive pathogen result |
| 133 | Male   | 10 years | Definite BA | Patients without neurosurgery but with a positive pathogen result |
| 134 | Male   | 3 years  | Definite BA | Surgery proven and pathogen positive                              |
| 136 | Female | 4 years  | Definite BA | Patients without neurosurgery but with a positive pathogen result |

|     |        |          |             |                                                                   |
|-----|--------|----------|-------------|-------------------------------------------------------------------|
| 138 | Male   | 10 years | Definite BA | Patients without neurosurgery but with a positive pathogen result |
| 139 | Female | 4 years  | Definite BA | Patients without neurosurgery but with a positive pathogen result |
| 140 | Male   | 13 years | Definite BA | Patients without neurosurgery but with a positive pathogen result |
| 141 | Male   | 8 years  | Definite BA | Patients without neurosurgery but with a positive pathogen result |
| 143 | Female | 14 years | Definite BA | Surgery proven and pathogen positive                              |
| 144 | Male   | 8 years  | Definite BA | Surgery proven and pathogen positive                              |
| 145 | Male   | 11 years | Definite BA | Patients without neurosurgery but with a positive pathogen result |
| 146 | Male   | 11 years | Definite BA | Patients without neurosurgery but with a positive pathogen result |
| 147 | Male   | 13 years | Definite BA | Surgery proven and pathogen positive                              |
| 149 | Female | 1 year   | Definite BA | Surgery proven and pathogen positive                              |
| 150 | Male   | 8 years  | Definite BA | Surgery proven and pathogen positive                              |
| 151 | Male   | 1 year   | Definite BA | Surgery proven and pathogen positive                              |
| 152 | Male   | 10 years | Definite BA | Patients without neurosurgery but with a positive pathogen result |
| 153 | Female | 15 years | Definite BA | Surgery proven and pathogen positive                              |
| 154 | Male   | 7 years  | Definite BA | Surgery proven and pathogen positive                              |
| 155 | Male   | 12 years | Definite BA | Patients without neurosurgery but with a positive pathogen result |
| 156 | Male   | 10 years | Definite BA | Patients without neurosurgery but with a positive pathogen result |
| 157 | Male   | 7 months | Definite BA | Patients without neurosurgery but with a positive pathogen result |
| 158 | Female | 7 years  | Definite BA | Patients without neurosurgery but with a positive pathogen result |
| 159 | Male   | 10 years | Definite BA | Surgery proven and pathogen positive                              |
| 160 | Male   | 14 days  | Definite BA | Patients without neurosurgery but with a positive pathogen result |
| 161 | Male   | 7 years  | Definite BA | Patients without neurosurgery but with a positive pathogen result |
| 162 | Male   | 7 years  | Definite BA | Surgery proven and pathogen positive                              |
| 163 | Female | 5 months | Definite BA | Patients without neurosurgery but with a positive pathogen result |
| 164 | Male   | 9 years  | Definite BA | Surgery proven but pathogen negative                              |
| 17  | Female | 1 month  | Probable BA | Improve after antibiotic treatments                               |

|     |        |          |             |                                                                                                                                                                                                                                                                                                                              |
|-----|--------|----------|-------------|------------------------------------------------------------------------------------------------------------------------------------------------------------------------------------------------------------------------------------------------------------------------------------------------------------------------------|
| 38  | Male   | 1 year   | Probable BA | Improve after antibiotic treatments                                                                                                                                                                                                                                                                                          |
| 41  | Female | 7 years  | Probable BA | Improve after antibiotic treatments                                                                                                                                                                                                                                                                                          |
| 50  | Male   | 10 years | Probable BA | Improve after antibiotic treatments                                                                                                                                                                                                                                                                                          |
| 51  | Male   | 5 years  | Probable BA | Improve after antibiotic treatments                                                                                                                                                                                                                                                                                          |
| 64  | Male   | 22 days  | Probable BA | Improve after antibiotic treatments                                                                                                                                                                                                                                                                                          |
| 68  | Female | 5 years  | Probable BA | Improve after antibiotic treatments                                                                                                                                                                                                                                                                                          |
| 72  | Female | 1 month  | Probable BA | Improve after antibiotic treatments                                                                                                                                                                                                                                                                                          |
| 78  | Male   | 2 years  | Probable BA | Improve after antibiotic treatments                                                                                                                                                                                                                                                                                          |
| 83  | Male   | 11 years | Probable BA | Improve after antibiotic treatments                                                                                                                                                                                                                                                                                          |
| 94  | Female | 10 years | Probable BA | Improve after antibiotic treatments                                                                                                                                                                                                                                                                                          |
| 99  | Female | 2 years  | Probable BA | Improve after antibiotic treatments                                                                                                                                                                                                                                                                                          |
| 103 | Female | 3 years  | Probable BA | Improve after antibiotic treatments                                                                                                                                                                                                                                                                                          |
| 111 | Female | 8 days   | Probable BA | Improve after antibiotic treatments                                                                                                                                                                                                                                                                                          |
| 125 | Male   | 4 years  | Probable BA | Improve after antibiotic treatments                                                                                                                                                                                                                                                                                          |
| 137 | Male   | 8 years  | Probable BA | Improve after antibiotic treatments                                                                                                                                                                                                                                                                                          |
| 53  | Male   | 10 years | Possible BA | The patient presented with fever and seizures. A significant predisposing factor was a recent neurosurgery. During the initial management, the patient received a 4-day course of antibiotics and was subsequently transferred to the local hospital. No follow-up information regarding the patient's outcome is available. |
| 54  | Male   | 4 months | Possible BA | The patient presented with fever and seizures, with a significant predisposing factor of bacterial meningitis. His parents discontinued the treatment and withdrew him from the hospital after only one day of admission.                                                                                                    |
| 60  | Female | 4 years  | Possible BA | The patient presented with fever and unconsciousness. Tetralogy of Fallot was a significant predisposing factor. The patient's condition deteriorated rapidly, and he succumbed after one day of hospitalization                                                                                                             |
| 71  | Female | 11 years | Possible BA | The patient presented with a fever. A prior history of neurosurgery was a predisposing factor. After completing a 20-day course of antibiotic treatment, she was subsequently transferred to local hospital. No repeat brain imaging was performed during her stay, and no follow-up information is available thereafter.    |

|     |        |          |             |                                                                                                                                                                                                                                                                                                                                                                                            |
|-----|--------|----------|-------------|--------------------------------------------------------------------------------------------------------------------------------------------------------------------------------------------------------------------------------------------------------------------------------------------------------------------------------------------------------------------------------------------|
| 79  | Female | 7 years  | Possible BA | The patient presented with fever, seizure, and unconsciousness. Pulmonary artery venous fistula and persistent cyanosis were the predisposing factors. Her condition progressed rapidly, and she succumbed within 24 hours of admission.                                                                                                                                                   |
| 80  | Male   | 3 years  | Possible BA | The patient presented with fever, limb hypertonia, and positive meningeal signs. He had an underlying condition of severe combined immunodeficiency. After a 19-day course of treatment, he was transferred to the local hospital. During his stay, no repeat brain imaging was performed. No follow-up information was available thereafter                                               |
| 82  | Female | 1 year   | Possible BA | The patient presented with fever, seizures, and unconsciousness. The cerebrospinal fluid findings indicated a purulent infection. Her condition deteriorated rapidly, and she succumbed one day after hospitalization.                                                                                                                                                                     |
| 84  | Female | 5 months | Possible BA | The patient presented with poor feeding. She had an underlying condition of meningocele and had undergone neurosurgery within the past 3 months. In addition to a brain abscess, a spinal abscess was found on her spinal MRI. After a 14-day course of antibiotics, her parents discontinued treatment and discharged her against medical advice. No follow-up information was available. |
| 85  | Female | 11 years | Possible BA | The patient presented with fever and had an underlying cyanotic congenital heart disease. After a 17-day course of antibiotics, her clinical condition improved; however, the brain abscess showed no significant reduction in size. Subsequently, she was transferred to a local hospital by her parents for further management. No follow-up information is available.                   |
| 128 | Female | 7 years  | Possible BA | The patients presented with headaches and had an underlying cavernous transformation of the portal vein. After receiving a 10-day course of antibiotics, she was transferred to the local hospital. No follow-up information was available.                                                                                                                                                |
| 142 | Female | 13 years | Possible BA | The patients presented with fever, seizures, and an alert mental status. She had an underlying condition of infectious endocarditis. Her condition deteriorated rapidly, and she succumbed after 3 days of hospitalization.                                                                                                                                                                |

BCH: Beijing Children's Hospital  
MRS: Medical Record System



**Supplementary Table S4 The distribution of hospitalized children and confirmed BA among different years**

| Years | No. of hospitalized patients | No. of confirmed BA | Percentage (%) |
|-------|------------------------------|---------------------|----------------|
| 2016  | 1244114                      | 105                 | 8.44           |
| 2017  | 1382111                      | 105                 | 7.60           |
| 2018  | 1461394                      | 104                 | 7.12           |
| 2019  | 1584608                      | 135                 | 8.52           |
| 2020  | 1192987                      | 105                 | 8.80           |
| 2021  | 1394197                      | 110                 | 7.89           |
| 2022  | 1238673                      | 98                  | 7.91           |
| 2023  | 1472763                      | 111                 | 7.54           |

BA: brain abscess

**Supplementary Table S5: The proportion of patients undergoing neurosurgical intervention among those with different predisposing factors**

|                               | Total cases | Number of cases | Proportion(%) |
|-------------------------------|-------------|-----------------|---------------|
| BA with unknown origin        | 338         | 118             | 34.9          |
| Meningitis                    | 138         | 10              | 7.2           |
| Contiguous infections *       | 107         | 24              | 22.4          |
| CHD                           | 126         | 38              | 30.2          |
| Incomplete skull **           | 59          | 15              | 25.4          |
| Immunocompromise              | 24          | 8               | 33.3          |
| Bloodstream infection         | 51          | 9               | 17.6          |
| Pulmonary artery fistula      | 4           | 2               | 50.0          |
| Dental infection              | 4           | 2               | 50.0          |
| Previous neurological surgery | 6           | 3               | 50.0          |
| Other underlying disease ***  | 16          | 4               | 25.0          |
| Total                         | 873         | 233             | 26.7          |

BA: brain abscess; CHD: congenital heart disease

\* including infections such as otitis media, sinusitis, and periorbital cellulitis, which are adjacent to the brain

\*\* including cerebrospinal fluid leak, open skull fracture and basilar skull fracture

\*\*\* Four of the five patients with Down syndrome were also diagnosed with congenital heart disease

**Supplementary Table S6 Neurosurgical intervention among patients with different predisposing factors**

| Predisposing factors          | 2020-2023(%) | 2016-2019(%) | P-value |
|-------------------------------|--------------|--------------|---------|
| BA with unknown origin        | 66(44.6)     | 52(27.4)     | 0.001   |
| Meningitis                    | 2(3.7)       | 8(9.5)       | 0.342   |
| Contiguous infections*        | 19(28.8)     | 5(12.2)      | 0.045   |
| CHD                           | 19(30.2)     | 19(30.2)     | 1.000   |
| Incomplete skull**            | 6(21.4)      | 3(13.0)      | 0.680   |
| Immunocompromise              | 8(25.0)      | 7(25.9)      | 0.935   |
| Bloodstream infection         | 2(15.4)      | 6(54.5)      | 0.082   |
| Pulmonary artery fistula      | 2(66.7)      | 0            | N/A     |
| Dental infection              | 2(50.0)      | 2(50.0)      | N/A     |
| Previous neurological surgery | 1(33.3)      | 2(66.7)      | 1.000   |
| Other underlying disease***   | 2(16.7)      | 2(50.0)      | 0.245   |

BA: brain abscess; CHD: congenital heart disease

\* including infections such as otitis media, sinusitis, and periorbital cellulitis, which are adjacent to the brain

\*\* including cerebrospinal fluid leak, open skull fracture and basilar skull fracture

\*\*\* Four of the five patients with Down syndrome were also diagnosed with congenital heart disease

N/A Not applicable

**Supplementary Table S7 The proportion of patients with complications among those with different predisposing factors**

|                               | Total cases | Number of cases | Proportion(%) |
|-------------------------------|-------------|-----------------|---------------|
| BA with unknown origin        | 338         | 111             | 32.8          |
| Meningitis                    | 138         | 62              | 44.9          |
| Contiguous infections *       | 107         | 32              | 29.9          |
| CHD                           | 126         | 41              | 32.5          |
| Incomplete skull **           | 59          | 13              | 54.2          |
| Immunocompromise              | 24          | 16              | 31.4          |
| Bloodstream infection         | 51          | 30              | 50.8          |
| Pulmonary artery fistula      | 4           | 3               | 75.0          |
| Dental infection              | 4           | 2               | 50.0          |
| Previous neurological surgery | 6           | 2               | 33.3          |
| Other underlying disease ***  | 16          | 6               | 37.5          |
| Total                         | 873         | 318             | 36.4          |

BA: brain abscess; CHD: congenital heart disease; CHD: congenital heart disease;

\* including infections such as otitis media, sinusitis, and periorbital cellulitis, which are adjacent to the brain

\*\* including cerebrospinal fluid leak, open skull fracture and basilar skull fracture

\*\*\* Four of the five patients with Down syndrome were also diagnosed with congenital heart disease

**Supplementary Table S8 Complications among patients with different predisposing factors**

| Predisposing factors          | 2020-2023(%) | 2016-2019(%) | P-value |
|-------------------------------|--------------|--------------|---------|
| BA with unknown origin        | 55(37.2)     | 56(29.5)     | 0.135   |
| Meningitis                    | 33(61.1)     | 29(34.5)     | 0.002   |
| Contiguous infections*        | 27(40.9)     | 5(12.2)      | 0.002   |
| CHD                           | 27(42.9)     | 14(22.2)     | 0.013   |
| Incomplete skull**            | 6(54.5)      | 7(53.8)      | 1.000   |
| Immunocompromise              | 7(25.0)      | 10(43.5)     | 0.164   |
| Bloodstream infection         | 19(59.4)     | 11(40.7)     | 0.154   |
| Pulmonary artery fistula      | 2(66.7)      | 1(100)       | N/A     |
| Dental infection              | 2(50)        | 0            | N/A     |
| Previous neurological surgery | 2(66.7)      | 0(0%)        | N/A     |
| Other underlying disease***   | 4(33.3)      | 2(50.0)      | 0.064   |

BA: brain abscess; CHD: congenital heart disease

\* including infections such as otitis media, sinusitis, and periorbital cellulitis, which are adjacent to the brain

\*\* including cerebrospinal fluid leak, open skull fracture and basilar skull fracture

\*\*\* Four of the five patients with Down syndrome were also diagnosed with congenital heart disease

N/A Not applicable
